# Supplementary figures and images for: Identification of Male Sex-Related Genes Regulated by SDHB in Macrobrachium nipponense Based on Transcriptome Analysis after an RNAi Knockdown
Source: MDPI journal article supplement (doi:10.3390/ijms241713176), 2023-08-24

# Violin plot for FPKM Values

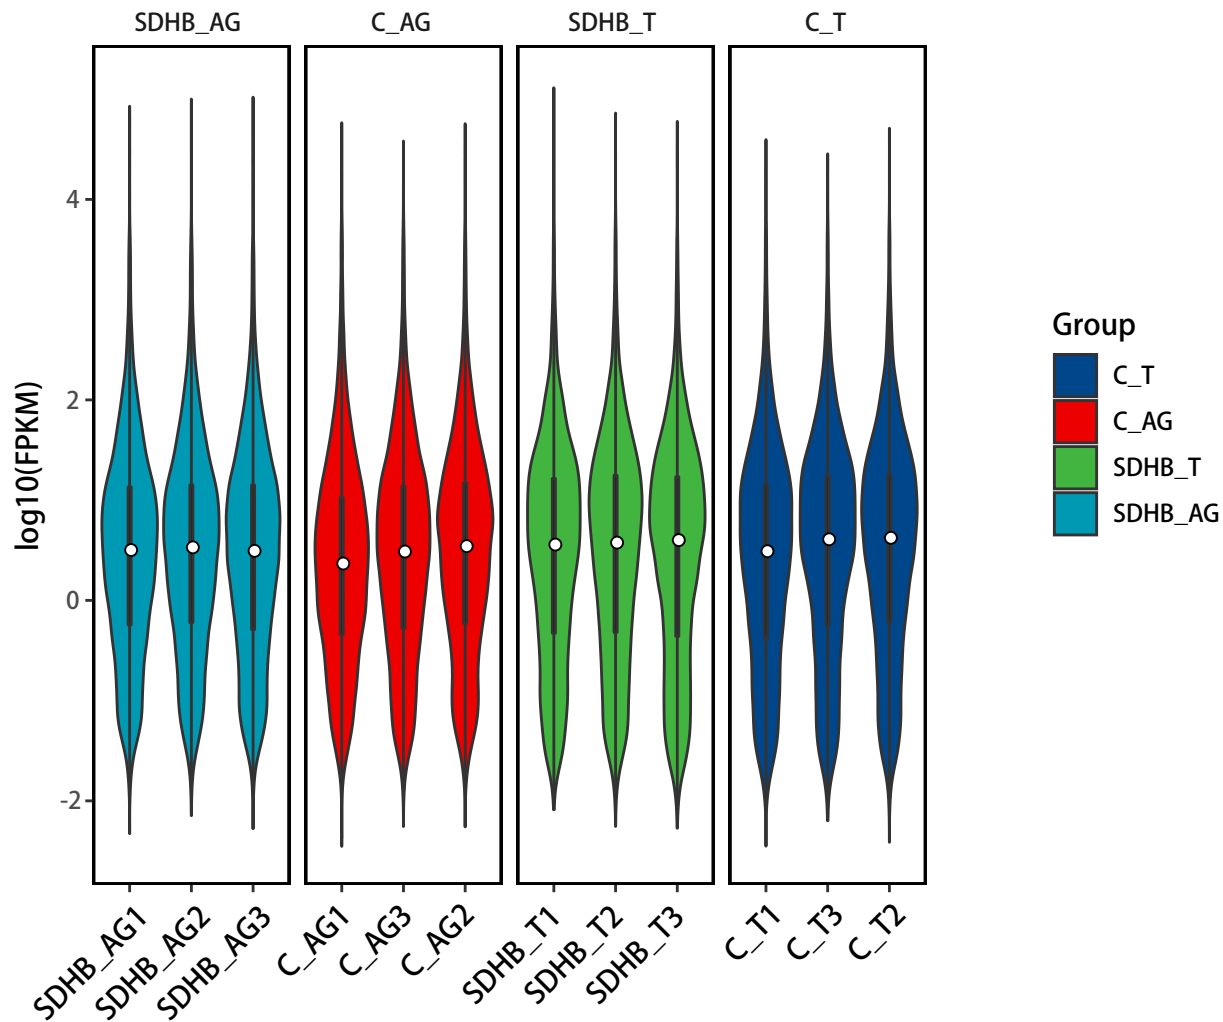

Supplement: s1 [file s1]
